# Supplementary material for: Toxicological analysis of satratoxins, the main toxins in the mushroom Trichoderma cornu-damae, in human serum and mushroom samples by liquid chromatography–tandem mass spectrometry
Source: Springer Nature journal article supplement (doi:10.1007/s11419-020-00549-4), 2020-09-16
Supplement: MOESM8 [file 18386696]

Table S1 Calibration equations, coefficients of determination and matrix effects for satratoxins in human serum

| Compound                          | Matrix | Calibration Equations                            | $r^2$ * | LOD       | LOQ     | Matrix Effect (Mean $\pm$ SD, $n = 5$ ) |                  |                  |
|-----------------------------------|--------|--------------------------------------------------|---------|-----------|---------|-----------------------------------------|------------------|------------------|
|                                   |        |                                                  |         |           |         | 1 ng/mL                                 | 5 ng/mL          | 20 ng/mL         |
| Satratoxin H                      | Serum  | $y = 8.33 \times 10^{-3}x - 6.39 \times 10^{-4}$ | 0.9998  | 0.1 ng/mL | 1 ng/mL | $88.7 \pm 6.8\%$                        | $91.7 \pm 4.4\%$ | $92.4 \pm 4.6\%$ |
| Satratoxin H<br>12'-Acetate       | Serum  | $y = 5.56 \times 10^{-3}x + 2.79 \times 10^{-3}$ | 0.9992  | 0.1 ng/mL | 1 ng/mL | $94.3 \pm 5.0\%$                        | $88.0 \pm 6.1\%$ | $88.7 \pm 4.0\%$ |
| Satratoxin H<br>13'-Acetate       | Serum  | $y = 6.16 \times 10^{-3}x + 9.64 \times 10^{-3}$ | 0.9998  | 0.1 ng/mL | 1 ng/mL | $105 \pm 8.8\%$                         | $110 \pm 3.8\%$  | $114 \pm 5.7\%$  |
| Satratoxin H<br>12',13'-Diacetate | Serum  | $y = 1.62 \times 10^{-2}x + 1.28 \times 10^{-2}$ | 0.9994  | 0.1 ng/mL | 1 ng/mL | $95.4 \pm 13.1\%$                       | $101 \pm 5.2\%$  | $107 \pm 4.7\%$  |

*LOD* limit of detection, *LOQ* limit of quantification, *SD* standard deviation

\* Coefficients of determination
