# Supplementary material for: Toxicological analysis of satratoxins, the main toxins in the mushroom Trichoderma cornu-damae, in human serum and mushroom samples by liquid chromatography–tandem mass spectrometry
Source: Springer Nature journal article supplement (doi:10.1007/s11419-020-00549-4), 2020-09-16
Supplement: MOESM11 [file 18386696]

Table S4 Stabilities of the four satratoxins in human serum samples under different storage conditions

| Concentration | Storage Temperature | Storage Period | Thawing Temperature | Compound                       | Recovery after Storage (% , $n = 5$ )* | Summary of Recovery (%) |
|---------------|---------------------|----------------|---------------------|--------------------------------|----------------------------------------|-------------------------|
| 20 ng/mL      | rt                  | 1 week         | -                   | Satratoxin H                   | 111 $\pm$ 9.26                         | 398                     |
|               |                     |                |                     | Satratoxin H 12'-Acetate       | 104 $\pm$ 7.2                          |                         |
|               |                     |                |                     | Satratoxin H 13'-Acetate       | 106 $\pm$ 9.39                         |                         |
|               |                     |                |                     | Satratoxin H 12',13'-Diacetate | 77.3 $\pm$ 4.65                        |                         |
|               | -20 °C              | 1 week         | rt                  | Satratoxin H                   | 99.4 $\pm$ 4.24                        | 399                     |
|               |                     |                |                     | Satratoxin H 12'-Acetate       | 101 $\pm$ 2.92                         |                         |
|               |                     |                |                     | Satratoxin H 13'-Acetate       | 97.6 $\pm$ 4.04                        |                         |
|               |                     |                |                     | Satratoxin H 12',13'-Diacetate | 101 $\pm$ 4.63                         |                         |
|               |                     | 1 week         | 4 °C                | Satratoxin H                   | 98.9 $\pm$ 3.68                        | 397                     |
|               |                     |                |                     | Satratoxin H 12'-Acetate       | 98.6 $\pm$ 2.93                        |                         |
|               |                     |                |                     | Satratoxin H 13'-Acetate       | 100 $\pm$ 4.31                         |                         |
|               |                     |                |                     | Satratoxin H 12',13'-Diacetate | 100 $\pm$ 4.48                         |                         |
|               |                     | 3 weeks        | rt                  | Satratoxin H                   | 100 $\pm$ 3.47                         | 399                     |
|               |                     |                |                     | Satratoxin H 12'-Acetate       | 99.4 $\pm$ 4.39                        |                         |
|               |                     |                |                     | Satratoxin H 13'-Acetate       | 98.3 $\pm$ 3.18                        |                         |
|               |                     |                |                     | Satratoxin H 12',13'-Diacetate | 100 $\pm$ 1.42                         |                         |
| 1 ng/mL       | -20 °C              | 1 week         | rt                  | Satratoxin H                   | 98.0 $\pm$ 3.36                        | 403                     |
|               |                     |                |                     | Satratoxin H 12'-Acetate       | 106 $\pm$ 5.88                         |                         |
|               |                     |                |                     | Satratoxin H 13'-Acetate       | 96.5 $\pm$ 5.80                        |                         |
|               |                     |                |                     | Satratoxin H 12',13'-Diacetate | 102 $\pm$ 1.48                         |                         |

rt room temperature

\* Mean  $\pm$  standard deviation.
