# Supplementary material for: Toxicological analysis of satratoxins, the main toxins in the mushroom Trichoderma cornu-damae, in human serum and mushroom samples by liquid chromatography–tandem mass spectrometry
Source: Springer Nature journal article supplement (doi:10.1007/s11419-020-00549-4), 2020-09-16
Supplement: MOESM12 [file 18386696]

Table S5 Standard addition calibration equations for satratoxins in mushroom samples

| Sample                           | Compound                       | Sample Extract Used | Equation <sup>a</sup>  | Coefficient of Determination ( $r^2$ ) | Matrix Effect <sup>b</sup> |
|----------------------------------|--------------------------------|---------------------|------------------------|----------------------------------------|----------------------------|
| Kyoto City,<br>14 September 2014 | Satratoxin H                   | 10 µg/mL            | $y = 1.07x + 0.00582$  | 0.9989                                 | $80.5 \pm 4.7$             |
|                                  | Satratoxin H 12'-Acetate       | 10 µg/mL            | $y = 0.984x + 0.00807$ | 0.9993                                 | $76.8 \pm 4.2$             |
|                                  | Satratoxin H 13'-Acetate       | 10 µg/mL            | $y = 0.873x + 0.00671$ | 0.9987                                 | $76.1 \pm 4.1$             |
|                                  | Satratoxin H 12',13'-Diacetate | 10 µg/mL            | $y = 3.69x + 0.0370$   | 0.9999                                 | $57.1 \pm 1.0$             |
| Ohtsu City,<br>7 September 2014  | Satratoxin H                   | 10 µg/mL            | $y = 0.931x + 0.00506$ | 0.9987                                 | $75.5 \pm 2.9$             |
|                                  | Satratoxin H 12'-Acetate       | 10 µg/mL            | $y = 0.801x + 0.00432$ | 0.9967                                 | $73.4 \pm 2.0$             |
|                                  | Satratoxin H 13'-Acetate       | 10 µg/mL            | $y = 0.857x + 0.00386$ | 0.9986                                 | $72.9 \pm 6.8$             |
|                                  | Satratoxin H 12',13'-Diacetate | 10 µg/mL            | $y = 3.32x + 0.0208$   | 0.9990                                 | $54.1 \pm 5.8$             |

<sup>a</sup> Concentrations of satratoxins were determined as the absolute values of the  $x$ -intercepts.

<sup>b</sup> Mean  $\pm$  standard deviation.
